# Supplementary material for: Pulmonary transcriptomic responses indicate a dual role of inflammation in pneumonia development and viral clearance during 2009 pandemic influenza infection
Source: PeerJ. 2017 Oct 11;5:e3915. doi: 10.7717/peerj.3915 (PMC5640978; doi:10.7717/peerj.3915)
Supplement: Supplemental Information 5 — Highlighted genes in colour represent genes involved in the top 20 canonical pathways identified by IPA. Orange: represent cytokines or chemokines genes and blue represent interferon stimulated genes. Red represents granzyme molecules. [file peerj-05-3915-s005.xls]

## Sheet: GEP
Probe name	Gene symbol	CAT09 day 1 pi		CAT09 day 5 pi		CAT09 day 10 pi		CAT09 day 1 vs day 5 pi		CAT09 day 5 vs day 10 pi		Description
		Average	SD	Average	SD	Average	SD	Δ day 5 vs day 1 pi	p value (day 1 vs day 5 pi	Δ day 10 vs day 5 pi	p value (day 5 vs day 10 pi)
A_51_P217463	Cxcl2	-2.09164	1.04958	2.24694	1.11072	1.89814	1.94491	4.33858	0	-0.348803	0.719	Mus musculus chemokine (C-X-C motif) ligand 2 (Cxcl2), mRNA [NM_009140]
A_55_P2127243	Tpsb2	-1.55251	0.364372	3.11015	1.10251	-0.266925	1.01762	4.66265	0	-3.37707	0.001	Mus musculus tryptase beta 2 (Tpsb2), mRNA [NM_010781]
A_55_P2178553	Apoa2	0.630455	0.187895	-1.07687	0.117423	-0.0484298	0.345997	-1.70733	0	1.02844	0	Mus musculus apolipoprotein A-II (Apoa2), mRNA [NM_013474]
A_55_P1968362	Tle1	0.277749	0.168848	-1.06043	0.25796	-0.18998	0.295168	-1.33818	0	0.870447	0.001	Mus musculus transducin-like enhancer of split 1, homolog of Drosophila E(spl) (Tle1), mRNA [NM_011599]
A_55_P2075627	Apc2	0.36609	0.325628	-0.949469	0.277777	-0.000962888	0.621412	-1.31556	0	0.948506	0.012	Mus musculus adenomatosis polyposis coli 2 (Apc2), mRNA [NM_011789]
A_55_P2094731	Sox13	0.833958	0.242652	-0.857024	0.343484	-0.3745	0.581883	-1.69098	0	0.482525	0.125	Mus musculus SRY-box containing gene 13 (Sox13), mRNA [NM_011439]
A_55_P2106911	Wnt1	0.522403	0.547009	-2.34095	0.568116	-0.831577	1.14846	-2.86336	0	1.50938	0.023	Mus musculus wingless-related MMTV integration site 1 (Wnt1), mRNA [NM_021279]
A_52_P187940	Lfng	0.721104	0.33953	-1.05342	0.533674	-0.53525	0.351208	-1.77452	0	0.518171	0.107	Mus musculus LFNG O-fucosylpeptide 3-beta-N-acetylglucosaminyltransferase (Lfng), mRNA [NM_008494]
A_51_P142107	Fzd7	0.706191	0.615337	-1.94955	0.770468	-0.430003	1.10739	-2.65574	0	1.51955	0.026	Mus musculus frizzled homolog 7 (Drosophila) (Fzd7), mRNA [NM_008057]
A_55_P2153862	Irak1	0.576891	0.31558	-0.87357	0.442037	-0.25657	0.29975	-1.45046	0	0.617	0.033	Mus musculus interleukin-1 receptor-associated kinase 1 (Irak1), transcript variant 5, mRNA [NM_001177974]
A_55_P2014531	Hes7	0.0863689	0.121005	-1.24367	0.290049	0.249303	0.529526	-1.33004	0	1.49297	0	Mus musculus hairy and enhancer of split 7 (Drosophila) (Hes7), mRNA [NM_033041]
A_51_P254855	Ptgs2	-0.293596	0.379948	0.773121	0.317512	0.409611	0.477409	1.06672	0.001	-0.36351	0.167	Mus musculus prostaglandin-endoperoxide synthase 2 (Ptgs2), mRNA [NM_011198]
A_66_P113868	Cdh3	-0.613785	0.495975	1.29973	0.646419	0.141327	0.463913	1.91352	0.001	-1.1584	0.012	Mus musculus cadherin 3 (Cdh3), transcript variant 2, mRNA [NM_007665]
A_51_P181286	Cd69	-0.444756	0.605429	1.92298	0.851944	0.504008	1.13639	2.36773	0.001	-1.41897	0.043	Mus musculus CD69 antigen (Cd69), mRNA [NM_001033122]
A_51_P140710	Ccl3	-0.745708	0.248403	2.28529	0.891478	0.224565	0.91487	3.031	0.001	-2.06073	0.005	Mus musculus chemokine (C-C motif) ligand 3 (Ccl3), mRNA [NM_011337]
A_51_P390715	Tgfb1	0.679149	0.388443	-0.934995	0.518386	-0.137384	0.624642	-1.61414	0.001	0.797611	0.046	Mus musculus transforming growth factor, beta 1 (Tgfb1), mRNA [NM_011577]
A_55_P2094060	Gzma	-0.373946	0.489065	1.16232	0.596487	0.2743	0.697074	1.53626	0.002	-0.888017	0.049	Mus musculus granzyme A (Gzma), mRNA [NM_010370]
A_51_P212782	Il1b	-0.827545	0.585392	1.34978	0.813209	0.148478	1.24919	2.17732	0.002	-1.2013	0.089	Mus musculus interleukin 1 beta (Il1b), mRNA [NM_008361]
A_51_P363187	Cxcl1	-0.571942	0.647198	3.01628	1.40273	1.70308	1.7972	3.58823	0.002	-1.31321	0.207	Mus musculus chemokine (C-X-C motif) ligand 1 (Cxcl1), mRNA [NM_008176]
A_51_P476209	Fscn3	-1.85928	0.206083	2.64174	1.38642	0.124331	0.641034	4.50102	0.002	-2.51741	0.012	Mus musculus fascin homolog 3, actin-bundling protein, testicular (Strongylocentrotus purpuratus) (Fscn3), mRNA [NM_019569]
A_55_P2057321	Myh7b	0.333845	0.488101	-1.23982	0.609445	-0.775981	0.885605	-1.57367	0.002	0.46384	0.333	Mus musculus myosin, heavy chain 7B, cardiac muscle, beta (Myh7b), mRNA [NM_001085378]
A_66_P104713	Lrp5	0.00927544	0.163304	-1.0863	0.396162	0.122353	0.386893	-1.09558	0.002	1.20866	0.001	Mus musculus low density lipoprotein receptor-related protein 5 (Lrp5), mRNA [NM_008513]
A_51_P129012	B2m	-0.242398	0.162097	0.735789	0.389975	0.428669	0.382253	0.978187	0.003	-0.307119	0.223	Mus musculus beta-2 microglobulin (B2m), mRNA [NM_009735]
A_55_P2031631	Igf1	-0.202574	0.440391	1.21697	0.591973	0.234612	0.695444	1.41954	0.003	-0.982353	0.032	Mus musculus insulin-like growth factor 1 (Igf1), transcript variant 1, mRNA [NM_010512]
A_55_P1990032	Cxcl5	-2.83011	0.399079	2.63115	2.01709	0.519025	0.338182	5.46126	0.003	-2.11212	0.079	Mus musculus chemokine (C-X-C motif) ligand 5 (Cxcl5), mRNA [NM_009141]
A_51_P284946	Rnd3	-0.24789	0.118441	0.927509	0.450058	0.154651	0.417181	1.1754	0.003	-0.772859	0.018	Mus musculus Rho family GTPase 3 (Rnd3), mRNA [NM_028810]
A_52_P436628	Vegfb	0.495966	0.190053	-0.674454	0.462558	-0.482495	0.358859	-1.17042	0.003	0.19196	0.472	Mus musculus vascular endothelial growth factor B (Vegfb), transcript variant 1, mRNA [NM_011697]
A_55_P2118173	Igf2	0.371188	0.531374	-1.65822	0.829234	-0.212829	0.396454	-2.02941	0.003	1.44539	0.014	Mus musculus insulin-like growth factor 2 (Igf2), transcript variant 1, mRNA [NM_010514]
A_55_P2016114	Fasl	-0.470757	0.518688	1.30141	0.791638	0.974235	0.59359	1.77217	0.004	-0.327174	0.47	Mus musculus Fas ligand (TNF superfamily, member 6) (Fasl), transcript variant 1, mRNA [NM_010177]
A_55_P1997756	Il6	-0.550496	0.247748	4.59561	2.0211	1.60815	1.10445	5.14611	0.004	-2.98747	0.026	Mus musculus interleukin 6 (Il6), mRNA [NM_031168]
A_66_P113556	Wnt16	-0.631188	0.15049	2.04851	1.057	-0.289257	0.308052	2.6797	0.004	-2.33777	0.006	Mus musculus wingless-related MMTV integration site 16 (Wnt16), mRNA [NM_053116]
A_55_P1953028	Tnfsf12	0.331715	0.239583	-1.26028	0.682932	-0.194359	0.399181	-1.592	0.004	1.06592	0.021	Mus musculus tumor necrosis factor (ligand) superfamily, member 12 (Tnfsf12), mRNA [NM_011614]
A_51_P509573	Ccl4	-1.1046	0.240806	2.53798	1.45676	0.195857	0.950173	3.64258	0.005	-2.34212	0.019	Mus musculus chemokine (C-C motif) ligand 4 (Ccl4), mRNA [NM_013652]
A_55_P2004761	H2-Eb2	-0.697991	0.466404	2.05923	1.20724	0.541865	0.802286	2.75722	0.005	-1.51736	0.049	Mus musculus histocompatibility 2, class II antigen E beta2 (H2-Eb2), mRNA [NM_001033978]
A_51_P404077	Fzd2	0.685203	0.54022	-0.958932	0.759228	-0.918957	0.737646	-1.64414	0.005	0.0399746	0.932	Mus musculus frizzled homolog 2 (Drosophila) (Fzd2), mRNA [NM_020510]
A_55_P1974441	Pdgfb	0.703474	0.461804	-1.50546	0.991452	-0.615477	0.703684	-2.20893	0.005	0.889979	0.136	Mus musculus platelet derived growth factor, B polypeptide (Pdgfb), mRNA [NM_011057]
A_51_P461779	Ppp2r2c	0.680606	0.685515	-1.23194	0.841242	0.376603	0.782762	-1.91254	0.005	1.60854	0.011	Mus musculus protein phosphatase 2 (formerly 2A), regulatory subunit B (PR 52), gamma isoform (Ppp2r2c), mRNA [NM_172994]
A_52_P68893	Ifng	-0.951268	0.714028	2.90366	1.79995	0.597697	0.954829	3.85493	0.006	-2.30596	0.043	Mus musculus interferon gamma (Ifng), mRNA [NM_008337]
A_55_P1998416	Ifi47	-0.480011	0.209139	1.87434	1.00821	0.156432	0.262392	2.35435	0.006	-1.71791	0.017	Mus musculus interferon gamma inducible protein 47 (Ifi47), mRNA [NM_008330]
A_55_P2121662	Mapk3	0.659705	0.185287	-0.986966	0.737754	-0.448511	0.359836	-1.64667	0.006	0.538455	0.19	Mus musculus mitogen-activated protein kinase 3 (Mapk3), mRNA [NM_011952]
A_55_P1954448	Myh14	1.32818	0.440406	-1.381	1.25342	-0.336389	0.369014	-2.70917	0.006	1.04461	0.137	Mus musculus myosin, heavy polypeptide 14 (Myh14), mRNA [NM_028021]
A_51_P220062	Mmp15	0.525337	0.224196	-1.18679	0.771256	-0.344542	0.389884	-1.71213	0.006	0.842253	0.071	Mus musculus matrix metallopeptidase 15 (Mmp15), mRNA [NM_008609]
A_55_P2046245	Hes1	0.38088	0.142013	-1.20439	0.723673	-0.90788	0.94805	-1.58527	0.007	0.296511	0.571	Mus musculus hairy and enhancer of split 1 (Drosophila) (Hes1), mRNA [NM_008235]
A_55_P2109712	Csnk1g2	0.389443	0.279679	-1.3391	0.825661	-0.375077	0.418562	-1.72854	0.007	0.964018	0.058	Mus musculus casein kinase 1, gamma 2 (Csnk1g2), transcript variant 1, mRNA [NM_134002]
A_55_P2159555	Adamts4	-1.09611	0.609406	2.22969	1.66417	0.849658	1.34333	3.3258	0.008	-1.38003	0.175	a disintegrin-like and metallopeptidase (reprolysin type) with thrombospondin type 1 motif, 4 [Source:MGI Symbol;Acc:MGI:1339949] [ENSMUST00000111315]
A_55_P2184009	Rnd2	0.416658	0.130606	-1.21728	0.772874	-0.173981	0.316351	-1.63393	0.008	1.0433	0.036	Mus musculus Rho family GTPase 2 (Rnd2), mRNA [NM_009708]
A_51_P385099	Tnf	-0.359181	0.616385	0.967706	0.618214	-0.10177	0.798959	1.32689	0.009	-1.06948	0.034	Mus musculus tumor necrosis factor (Tnf), mRNA [NM_013693]
A_52_P79782	Wnt7a	0.548767	0.483269	-0.947148	0.787833	-0.452669	0.674205	-1.49591	0.009	0.494478	0.301	Mus musculus wingless-related MMTV integration site 7A (Wnt7a), mRNA [NM_009527]
A_55_P2177013	Cldn23	0.326823	0.478353	-0.707862	0.505182	-0.222982	0.333139	-1.03469	0.01	0.48488	0.11	Mus musculus claudin 23 (Cldn23), mRNA [NM_027998]
A_55_P2016462	Cxcl10	-0.900686	0.485184	4.1566	2.5981	0.816436	0.992282	5.05728	0.011	-3.34016	0.042	Mus musculus chemokine (C-X-C motif) ligand 10 (Cxcl10), mRNA [NM_021274]
A_51_P144180	Ifnb1	-0.317451	0.936999	6.06387	3.34146	-0.392603	0.910052	6.38132	0.011	-6.45647	0.011	Mus musculus interferon beta 1, fibroblast (Ifnb1), mRNA [NM_010510]
A_55_P2085779	Ifi27l2b	-0.458137	0.321703	1.8538	1.24007	0.21105	0.34769	2.31193	0.012	-1.64275	0.039	Mus musculus interferon, alpha-inducible protein 27 like 2B (Ifi27l2b), mRNA [NM_145449]
A_55_P1998943	Oas1a	-0.369867	0.377928	2.44045	1.50167	0.416915	0.921856	2.81031	0.012	-2.02353	0.037	Mus musculus 2'-5' oligoadenylate synthetase 1A (Oas1a), mRNA [NM_145211]
A_51_P385812	Il12b	-0.423132	0.367291	1.17945	0.883892	0.411124	0.80377	1.60258	0.012	-0.768327	0.172	Mus musculus interleukin 12b (Il12b), mRNA [NM_008352]
A_55_P1971951	Cd86	-0.247452	0.170859	1.34352	0.839277	0.532527	0.613083	1.59097	0.012	-0.810994	0.114	Mus musculus CD86 antigen (Cd86), mRNA [NM_019388]
A_55_P2034033	Il12rb1	-0.295984	0.469683	2.23459	1.3771	1.36222	1.38087	2.53058	0.012	-0.872377	0.324	Mus musculus interleukin 12 receptor, beta 1 (Il12rb1), mRNA [NM_008353]
A_55_P2123957	Acvr1b	0.921206	0.697863	-1.35236	1.2804	-0.336476	0.932645	-2.27356	0.012	1.01588	0.182	Mus musculus activin A receptor, type 1B (Acvr1b), mRNA [NM_007395]
A_51_P234956	Xcl1	-0.481218	0.638845	2.54532	1.69276	0.162714	0.867121	3.02654	0.013	-2.38261	0.031	Mus musculus chemokine (C motif) ligand 1 (Xcl1), mRNA [NM_008510]
A_55_P2066578	Ifi204	-0.272748	0.24059	2.79039	1.62122	0.431592	0.606479	3.06314	0.013	-2.3588	0.028	Mus musculus interferon activated gene 204, mRNA (cDNA clone MGC:18551 IMAGE:4018506), complete cds. [BC010546]
A_51_P279606	Socs1	-0.00131721	0.273092	2.89598	1.56528	0.0334052	1.48135	2.89729	0.013	-2.86257	0.014	Mus musculus suppressor of cytokine signaling 1 (Socs1), mRNA [NM_009896]
A_51_P220162	Notch3	0.122517	0.125905	-0.867512	0.553299	-0.0968976	0.215516	-0.990028	0.015	0.770614	0.032	Mus musculus Notch gene homolog 3 (Drosophila) (Notch3), mRNA [NM_008716]
A_55_P2066523	Akt2	0.0704216	0.335599	-0.930649	0.596546	-0.103945	0.439198	-1.00107	0.016	0.826705	0.036	Mus musculus thymoma viral proto-oncogene 2 (Akt2), transcript variant 1, mRNA [NM_001110208]
A_51_P286737	Ccl2	-0.0859273	0.606829	3.34514	2.04699	0.746553	1.45154	3.43107	0.017	-2.59859	0.048	Mus musculus chemokine (C-C motif) ligand 2 (Ccl2), mRNA [NM_011333]
A_51_P444447	Cebpd	-0.108305	0.151583	0.995076	0.644954	0.387571	0.923805	1.10338	0.017	-0.607505	0.233	Mus musculus CCAAT/enhancer binding protein (C/EBP), delta (Cebpd), mRNA [NM_007679]
A_51_P112355	Igtp	-0.447032	0.132845	2.12229	1.49144	0.434834	0.474019	2.56932	0.018	-1.68745	0.063	Mus musculus interferon gamma induced GTPase (Igtp), mRNA [NM_018738]
A_51_P257419	Lhx2	-0.489935	0.475261	2.94611	2.05316	0.964148	1.80048	3.43605	0.018	-1.98196	0.13	Mus musculus LIM homeobox protein 2 (Lhx2), mRNA [NM_010710]
A_51_P476018	Sox7	0.389515	0.192042	-0.895343	0.764379	-0.859747	0.733117	-1.28486	0.018	0.0355961	0.939	Mus musculus SRY-box containing gene 7 (Sox7), mRNA [NM_011446]
A_52_P509965	Ager	0.396548	0.142522	-0.935302	0.781975	-0.442883	0.559326	-1.33185	0.018	0.492419	0.276	Mus musculus advanced glycosylation end product-specific receptor (Ager), mRNA [NM_007425]
A_51_P472274	Sox18	0.54765	0.555802	-0.974137	0.937102	-0.661443	0.612765	-1.52179	0.018	0.312694	0.543	Mus musculus SRY-box containing gene 18 (Sox18), mRNA [NM_009236]
A_51_P396643	Ncstn	0.42875	0.626049	-1.16275	0.962766	-0.314738	0.306025	-1.5915	0.018	0.848009	0.121	Mus musculus nicastrin (Ncstn), mRNA [NM_021607]
A_51_P230552	Rfng	0.244745	0.481831	-1.09207	0.818391	-0.298873	0.904854	-1.33681	0.018	0.793195	0.162	Mus musculus RFNG O-fucosylpeptide 3-beta-N-acetylglucosaminyltransferase (Rfng), mRNA [NM_009053]
A_55_P2086433	Oasl1	-0.270956	0.210511	2.88904	1.90944	0.351553	0.558314	3.15999	0.02	-2.53748	0.039	Mus musculus 2'-5' oligoadenylate synthetase-like 1 (Oasl1), mRNA [NM_145209]
A_55_P1985850	Timp1	-0.468715	0.501854	2.3778	1.75838	0.426679	1.34658	2.84652	0.02	-1.95112	0.079	Mus musculus tissue inhibitor of metalloproteinase 1 (Timp1), transcript variant 1, mRNA [NM_001044384]
A_55_P1991773	Icos	-0.773436	0.439847	1.75839	1.57453	1.52389	0.804587	2.53183	0.02	-0.234505	0.773	Mus musculus inducible T-cell co-stimulator (Icos), mRNA [NM_017480]
A_55_P2019719	Oas2	-0.561569	0.245738	2.16727	1.65029	0.590585	0.574747	2.72884	0.02	-1.57668	0.1	Mus musculus 2'-5' oligoadenylate synthetase 2 (Oas2), mRNA [NM_145227]
A_55_P2113498	Klrd1	-0.200512	0.310027	1.0324	0.78427	0.309153	0.390033	1.23291	0.021	-0.723247	0.113	Mus musculus killer cell lectin-like receptor, subfamily D, member 1 (Klrd1), mRNA [NM_010654]
A_55_P2192577	1700014N06Rik	0.115479	0.177099	-0.934628	0.656009	-0.0561794	0.355908	-1.05011	0.021	0.878448	0.037	Mus musculus RIKEN cDNA 1700014N06 gene (1700014N06Rik), mRNA [NM_027067]
A_55_P2145922	Myh9	0.253959	0.254559	-1.24095	0.936711	-0.0729291	0.40724	-1.49491	0.021	1.16802	0.046	myosin, heavy polypeptide 9, non-muscle [Source:MGI Symbol;Acc:MGI:107717] [ENSMUST00000065458]
A_55_P2007228	Prkaca	0.299779	0.278804	-0.920519	0.778118	-0.101703	0.256406	-1.2203	0.021	0.818817	0.077	Mus musculus protein kinase, cAMP dependent, catalytic, alpha (Prkaca), mRNA [NM_008854]
A_55_P1975560	Ifi204	-0.411312	0.232823	2.5379	1.8317	0.638931	0.596969	2.94921	0.022	-1.89897	0.08	Mus musculus interferon activated gene 204 (Ifi204), mRNA [NM_008329]
A_52_P307739	Sox2	0.251784	0.512725	-1.16861	0.920505	-0.354076	0.541249	-1.4204	0.022	0.814539	0.13	Mus musculus SRY-box containing gene 2 (Sox2), mRNA [NM_011443]
A_51_P461665	Cxcl9	-0.87657	0.892465	3.07168	2.63583	1.68963	1.72827	3.94825	0.025	-1.38205	0.349	Mus musculus chemokine (C-X-C motif) ligand 9 (Cxcl9), mRNA [NM_008599]
A_66_P130432	Cd80	-0.50934	0.436143	0.794239	0.869336	1.02672	0.624714	1.30358	0.025	0.232476	0.632	Mus musculus CD80 antigen (Cd80), mRNA [NM_009855]
A_55_P2177910	Lepr	-0.151324	0.254004	-1.66308	0.989842	0.568283	0.785371	-1.51176	0.025	2.23136	0.004	Mus musculus leptin receptor (Lepr), transcript variant 2, mRNA [NM_010704]
A_55_P1966731	Ifi203	-0.281084	0.157123	1.81133	1.36183	0.327301	0.418737	2.09242	0.026	-1.48403	0.07	Mus musculus interferon activated gene 203 (Ifi203), transcript variant 1, mRNA [NM_001045481]
A_51_P470079	Il1r2	-0.0737367	0.925603	1.4079	0.79062	0.873909	1.8155	1.48163	0.027	-0.533987	0.536	Mus musculus interleukin 1 receptor, type II (Il1r2), mRNA [NM_010555]
A_55_P2093286	Apod	-0.375263	0.425612	2.02947	1.63701	-0.110195	0.53628	2.40474	0.028	-2.13967	0.041	Mus musculus apolipoprotein D (Apod), mRNA [NM_007470]
A_55_P1990944	Casp1	-0.159264	0.202267	1.11759	0.862502	0.324316	0.388656	1.27685	0.028	-0.793274	0.112	Mus musculus caspase 1 (Casp1), mRNA [NM_009807]
A_55_P1998843	Ifi203	-0.725875	0.107098	1.46281	1.48263	0.437019	0.259473	2.18869	0.03	-1.02579	0.198	Mus musculus interferon activated gene 203 (Ifi203), transcript variant 1, mRNA [NM_001045481]
A_51_P327751	Ifit1	-0.0892205	0.357154	2.39597	1.75267	0.110146	0.493607	2.48519	0.032	-2.28582	0.041	Mus musculus interferon-induced protein with tetratricopeptide repeats 1 (Ifit1), mRNA [NM_008331]
A_55_P1984556	Ccl12	0.267105	0.298558	2.49625	1.56715	0.0114453	1.18903	2.22914	0.032	-2.4848	0.021	Mus musculus chemokine (C-C motif) ligand 12 (Ccl12), mRNA [NM_011331]
A_55_P2173210	LOC100504287	-0.155428	0.243609	1.74024	1.3272	0.125294	0.417582	1.89567	0.032	-1.61495	0.051	PREDICTED: Mus musculus interferon-activable protein 203-like (LOC100504287), mRNA [XM_003084464]
A_55_P1988202	Ifi203	-0.236019	0.271594	1.24259	1.05851	0.293698	0.235277	1.47861	0.033	-0.948893	0.116	Mus musculus interferon activated gene 203 (Ifi203), transcript variant 1, mRNA [NM_001045481]
A_51_P436652	Ccl7	0.167116	0.434992	3.1528	2.14778	0.686095	1.64024	2.98568	0.034	-2.4667	0.071	Mus musculus chemokine (C-C motif) ligand 7 (Ccl7), mRNA [NM_013654]
A_51_P439584	Rhov	0.200177	0.679564	-0.988842	0.787777	-0.271329	0.502201	-1.18902	0.034	0.717513	0.125	Mus musculus ras homolog gene family, member V (Rhov), mRNA [NM_145530]
A_51_P378789	Cxcl13	-0.902277	1.50744	1.37014	1.31491	0.864789	1.52692	2.27242	0.035	-0.505355	0.57	Mus musculus chemokine (C-X-C motif) ligand 13 (Cxcl13), mRNA [NM_018866]
A_55_P2005783	Ifih1	-0.0589586	0.186075	1.03976	0.799329	-0.101009	0.321303	1.09871	0.035	-1.14077	0.03	Mus musculus interferon induced with helicase C domain 1 (Ifih1), transcript variant 1, mRNA [NM_027835]
A_55_P1990633	Iigp1	0.0299027	0.262221	2.24785	1.59742	-0.0753574	0.656723	2.21795	0.035	-2.32321	0.028	Mus musculus interferon inducible GTPase 1 (Iigp1), transcript variant 2, mRNA [NM_001146275]
A_55_P2094469	Kdr	-0.149341	0.195929	-1.56671	1.02216	1.02225	0.687648	-1.41737	0.035	2.58896	0.002	Mus musculus kinase insert domain protein receptor (Kdr), mRNA [NM_010612]
A_51_P154842	Oas1f	-0.183801	0.221209	2.13527	1.68513	0.434874	0.959404	2.31907	0.036	-1.7004	0.091	Mus musculus 2'-5' oligoadenylate synthetase 1F (Oas1f), mRNA [NM_145153]
A_55_P2014978	Dvl3	-0.210683	0.186386	-1.99003	1.29678	1.25976	0.646506	-1.77935	0.037	3.24979	0.003	Mus musculus dishevelled 3, dsh homolog (Drosophila) (Dvl3), mRNA [NM_007889]
A_52_P607128	Msr1	-0.186164	0.287343	1.14323	0.996616	0.782542	1.15336	1.3294	0.038	-0.36069	0.592	Mus musculus macrophage scavenger receptor 1 (Msr1), transcript variant 1, mRNA [NM_031195]
A_52_P428496	Rhoa	-0.159616	0.35498	-1.07547	0.692506	0.398128	0.784506	-0.915856	0.039	1.4736	0.009	Mus musculus ras homolog gene family, member A (Rhoa), mRNA [NM_016802]
A_51_P130095	Fcgr2b	-0.0797149	0.460685	0.939757	0.767817	0.121896	0.693774	1.01947	0.041	-0.817861	0.102	Mus musculus Fc receptor, IgG, low affinity IIb (Fcgr2b), transcript variant 1, mRNA [NM_001077189]
A_55_P2042331	Gzmk	-1.35538	1.07622	1.44683	2.15944	2.36276	1.07295	2.8022	0.042	0.915934	0.423	granzyme K [Source:MGI Symbol;Acc:MGI:1298232] [ENSMUST00000122399]
A_51_P487690	Ifi44	-0.0862832	0.389211	1.82696	1.49656	-0.0917168	0.370656	1.91324	0.044	-1.91867	0.044	Mus musculus interferon-induced protein 44 (Ifi44), mRNA [NM_133871]
A_51_P161021	Ifit2	-0.0904486	0.223838	1.6964	1.42822	-0.0940336	0.37024	1.78685	0.048	-1.79043	0.047	Mus musculus interferon-induced protein with tetratricopeptide repeats 2 (Ifit2), mRNA [NM_008332]
A_51_P199135	Cd83	-0.21673	0.156427	1.03672	1.0034	0.53546	0.509621	1.25345	0.048	-0.501259	0.352	Mus musculus CD83 antigen (Cd83), mRNA [NM_009856]
A_66_P119034	Pla2g7	-0.0758076	0.329277	0.940295	0.8316	0.613515	1.0046	1.0161	0.05	-0.32678	0.57	Mus musculus phospholipase A2, group VII (platelet-activating factor acetylhydrolase, plasma) (Pla2g7), mRNA [NM_013737]
A_52_P578732	Ccr5	-0.0593928	0.542613	1.50055	1.27955	0.557892	0.981033	1.55994	0.05	-0.942656	0.217	Mus musculus chemokine (C-C motif) receptor 5 (Ccr5), mRNA [NM_009917]
A_51_P333274	Gzmb	-0.724139	0.417971	1.8871	2.13208	0.813828	0.706083	2.61124	0.051	-1.07327	0.333	Mus musculus granzyme B (Gzmb), mRNA [NM_013542]
A_55_P2045208	Dll3	-0.138805	0.16744	-0.83892	0.582104	0.209181	0.28368	-0.700115	0.053	1.0481	0.012	Mus musculus delta-like 3 (Drosophila) (Dll3), mRNA [NM_007866]
A_51_P464703	Ccl8	-0.506651	0.972404	1.40632	1.59481	0.707859	1.17088	1.91297	0.058	-0.698461	0.442	Mus musculus chemokine (C-C motif) ligand 8 (Ccl8), mRNA [NM_021443]
A_51_P359570	Ifit3	0.213997	0.294661	2.15084	1.6691	-0.218715	0.657901	1.93684	0.059	-2.36955	0.03	Mus musculus interferon-induced protein with tetratricopeptide repeats 3 (Ifit3), mRNA [NM_010501]
A_51_P184484	Mmp13	-0.040993	0.500988	0.944904	0.84624	-0.0154913	0.755233	0.985897	0.063	-0.960395	0.084	Mus musculus matrix metallopeptidase 13 (Mmp13), mRNA [NM_008607]
A_55_P2048279	Tlr13	0.0237397	0.161538	0.863264	0.811059	0.400362	0.808961	0.839524	0.081	-0.462902	0.371	Mus musculus toll-like receptor 13 (Tlr13), mRNA [NM_205820]
A_55_P1970489	Il12rb2	-0.149956	0.325536	-1.09057	0.923989	0.0709902	0.278958	-0.940615	0.085	1.16156	0.046	Mus musculus interleukin 12 receptor, beta 2 (Il12rb2), mRNA [NM_008354]
A_55_P2149209	Camk2a	-0.0727772	0.438009	-0.804008	0.723058	-0.460013	0.856431	-0.731231	0.097	0.343995	0.488	Mus musculus calcium/calmodulin-dependent protein kinase II alpha (Camk2a), transcript variant 1, mRNA [NM_009792]
A_52_P100926	Il1a	0.210828	0.33622	1.23731	1.10758	-0.171848	0.395089	1.02648	0.107	-1.40916	0.044	Mus musculus interleukin 1 alpha (Il1a), mRNA [NM_010554]
A_55_P1975140	Acvr1c	-0.173616	1.5552	0.235193	1.045	0.0483764	1.78966	0.408808	0.641	-0.186816	0.835	Mus musculus activin A receptor, type IC (Acvr1c), transcript variant 1, mRNA [NM_001111030]
